# Supplementary material for: Unravel the Supremacy of Klebsiella variicola over Native Microbial Strains for Aroma-Enhancing Compound Production in Reconstituted Tobacco Concentrate through Metagenomic Analysis
Source: MDPI journal article supplement (doi:10.3390/metabo14030158), 2024-03-08
Supplement: s1 [file s1]

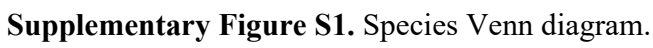

**Supplementary Figure S1. Species Venn diagram.**

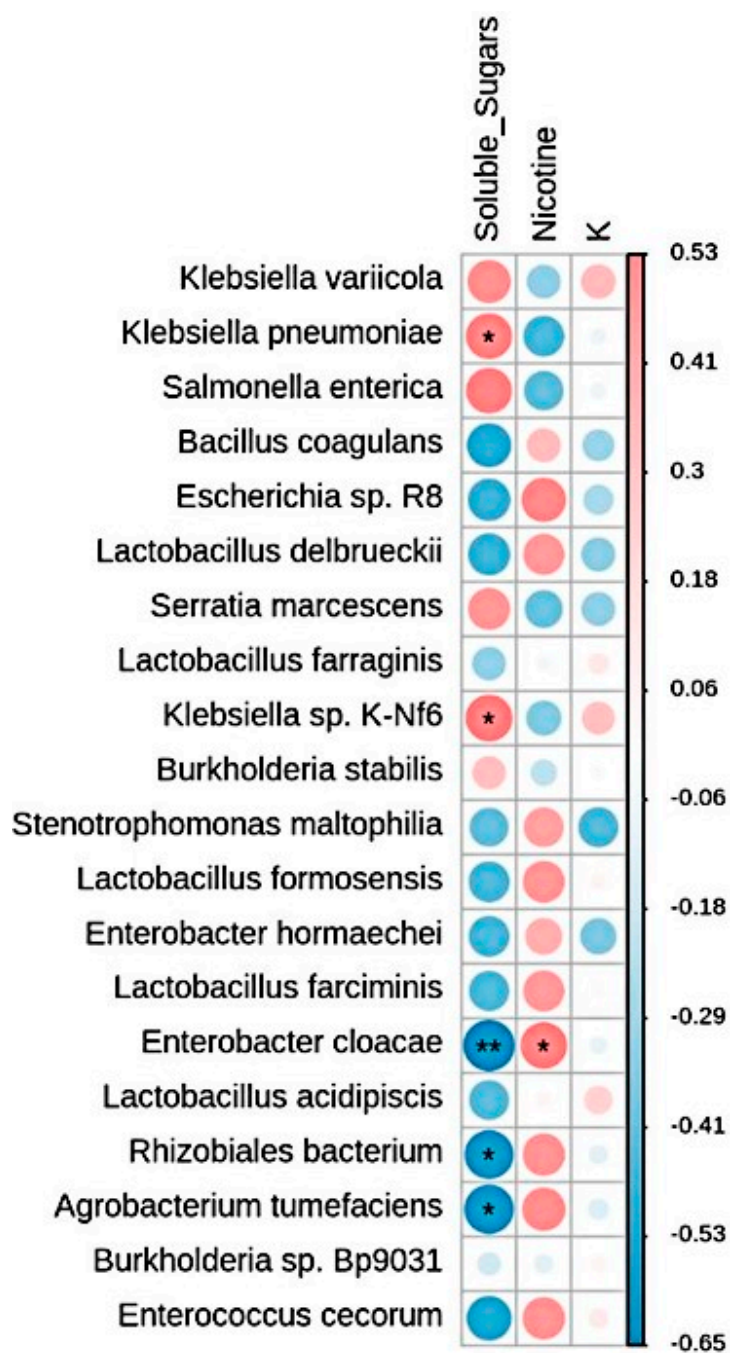

**Supplementary Figure S2.** Correlation diagram between conventional chemical components and microorganisms. (The red in the figure represents a positive correlation, while the blue represents a negative correlation. The darker the color, the higher the correlation). The asterisks (\*) and (\*\*) indicate significant and highly significant correlations, respectively.

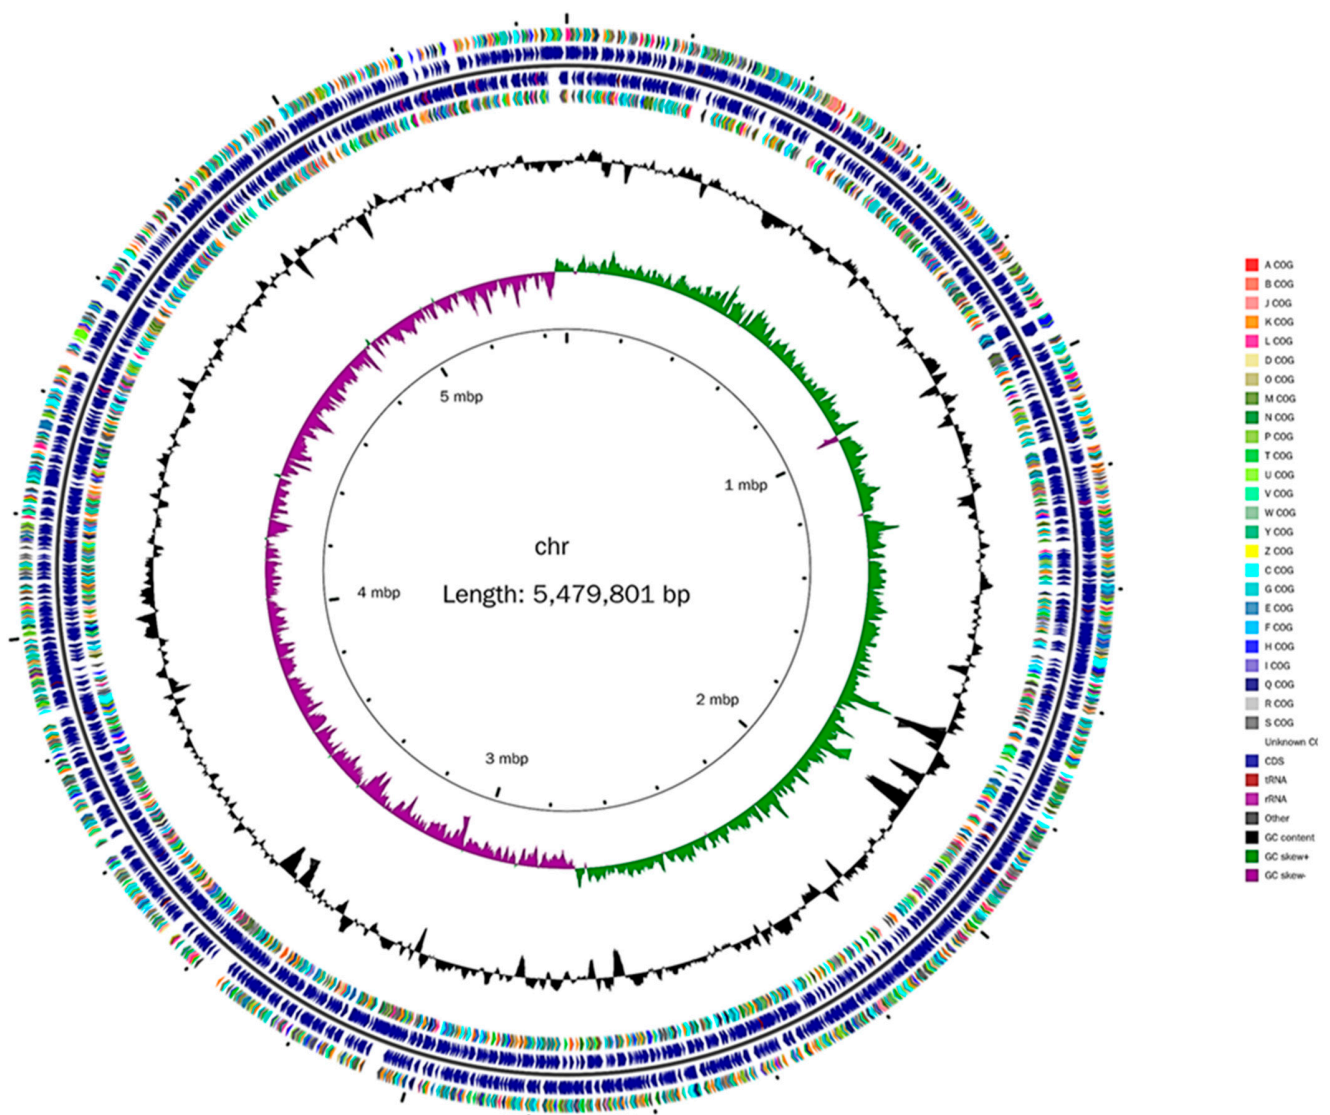

**Supplementary Figure S3.** The map of chromosome of *Klebsiella variicola* H8 strain.

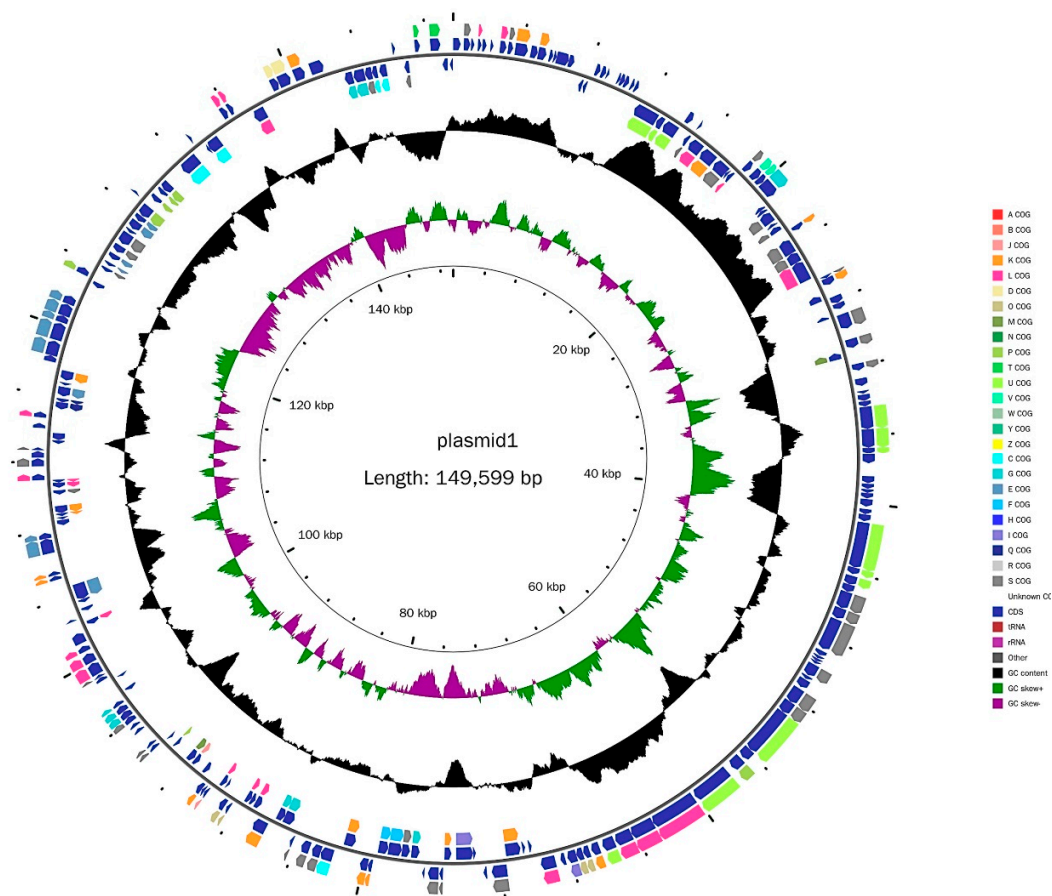

**Supplementary Figure S4.** The map of plasmid of *Klebsiella variicola* H8 strain.

## Supplementary Tables

**Supplementary Table S1.** Mass fraction of conventional chemical components of concentrated solution

| Sample | Water-soluble<br>Total Sugar<br>(%) | Total<br>Alkaloids<br>(%) | Potassium<br>(%) |
|--------|-------------------------------------|---------------------------|------------------|
| 0 h    | 6.83                                | 1.34                      | 3.63             |
| 8 h    | 6.49                                | 1.30                      | 3.66             |
| 16 h   | 5.25                                | 1.27                      | 3.64             |
| 24 h   | 4.78                                | 1.32                      | 3.67             |

36 h

4.37

1.33

3.80

**Supplementary Table S2. CAZy gene cluster annotation results**

| Type | Family | Gene cluster | Associated protein                                                                               |
|------|--------|--------------|--------------------------------------------------------------------------------------------------|
| chr  | CE     | CE1          | acetyl xylan esterase (EC 3.1.1.72)                                                              |
|      |        | CE10         | arylesterase (EC 3.1.1.-)                                                                        |
|      |        | CE11         | UDP-3-0-acyl N-acetylglucosamine deacetylase (EC 3.5.1.-).                                       |
|      |        | CE14         | N-acetyl-1-D-myo-inosityl-2-amino-2-deoxy- $\alpha$ -D-glucopyranoside deacetylase (EC 3.5.1.89) |
|      |        | CE3          | acetyl xylan esterase (EC 3.1.1.72).                                                             |
|      |        | CE7          | acetyl xylan esterase (EC 3.1.1.72)                                                              |
|      |        | CE8          | pectin methylesterase (EC 3.1.1.11).                                                             |
|      |        | CE9          | N-acetylglucosamine 6-pHospHate deacetylase (EC 3.5.1.25)                                        |
|      | GH     | GH1          | beta-glucosidase (EC 3.2.1.21)                                                                   |
|      |        | GH102        | peptidoglycan lytic transglycosylase (EC 3.2.1.-)                                                |
|      |        | GH103        | peptidoglycan lytic transglycosylase (EC 3.2.1.-)                                                |
|      |        | GH105        | unsaturated rhamnogalacturonyl hydrolase (EC 3.2.1.-)                                            |
|      |        | GH109        | $\alpha$ pHa-N-acetylgalactosaminidase (EC 3.2.1.49)                                             |
|      |        | GH13         | $\alpha$ pHa-amylase (EC 3.2.1.1)                                                                |
|      |        | GH18         | chitinase (EC 3.2.1.14)                                                                          |
|      |        | GH19         | chitinase (EC 3.2.1.14).                                                                         |
|      |        | GH2          | beta-galactosidase (EC 3.2.1.23)                                                                 |
|      |        | GH23         | lysozyme type G (EC 3.2.1.17)                                                                    |
|      |        | GH24         | lysozyme (EC 3.2.1.17)                                                                           |
|      |        | GH28         | polygalacturonase (EC 3.2.1.15)                                                                  |
|      |        | GH3          | beta-glucosidase (EC 3.2.1.21)                                                                   |
|      |        | GH31         | $\alpha$ pHa-glucosidase (EC 3.2.1.20)                                                           |
|      |        | GH32         | invertase (EC 3.2.1.26)                                                                          |
|      |        | GH33         | sialidase or neuraminidase (EC 3.2.1.18)                                                         |
|      |        | GH36         | $\alpha$ pHa-galactosidase (EC 3.2.1.22)                                                         |
|      |        | GH37         | $\alpha$ pHa, $\alpha$ pHa-trehalase (EC 3.2.1.28).                                              |
|      |        | GH39         | $\alpha$ pHa-L-iduronidase (EC 3.2.1.76)                                                         |
|      |        | GH4          | maltose-6-pHospHate glucosidase (EC 3.2.1.122)                                                   |
|      |        | GH42         | beta-galactosidase (EC 3.2.1.23)                                                                 |
|      |        | GH53         | endo-beta-1,4-galactanase (EC 3.2.1.89).                                                         |
|      |        | GH73         | peptidoglycan hydrolase with endo-beta-N-acetylglucosaminidase specificity (EC 3.2.1.-)          |
|      |        | GH77         | amylomaltase or 4- $\alpha$ pHa-glucanotransferase (EC                                           |

|         |    |      |                                                                                                 |
|---------|----|------|-------------------------------------------------------------------------------------------------|
|         |    |      | 2.4.1.25)                                                                                       |
|         |    | GH78 | alpHa-L-rhamnosidase (EC 3.2.1.40)                                                              |
|         |    | GH8  | chitosanase (EC 3.2.1.132)                                                                      |
| chr     |    | GT19 | lipid-A-disaccharide synthase (EC 2.4.1.182).                                                   |
|         |    | GT2  | cellulose synthase (EC 2.4.1.12)                                                                |
|         |    | GT20 | alpHa,alpHa-trehalose-pHospHate synthase [UDP-forming] (EC 2.4.1.15)                            |
|         |    | GT26 | UDP-ManNAcA: beta-N-acetyl mannosaminuronyltransferase (EC 2.4.1.-)                             |
|         |    | GT28 | 1,2-diacylglycerol 3-beta-galactosyltransferase (EC 2.4.1.46)                                   |
|         |    | GT30 | CMP-beta-KDO: alpHa-3-deoxy-D-manno-octulosonic-acid (KDO) transferase (EC 2.4.99.-).           |
|         | GT | GT35 | glycogen or starch pHospHorylase (EC 2.4.1.1).                                                  |
|         |    | GT4  | sucrose synthase (EC 2.4.1.13)                                                                  |
|         |    | GT5  | UDP-Glc: glycogen glucosyltransferase (EC 2.4.1.11)                                             |
|         |    | GT51 | murein polymerase (EC 2.4.1.129).                                                               |
|         |    | GT56 | TDP-Fuc4NAc: lipid II Fuc4NAc transferase (EC 2.4.1.-)                                          |
|         |    | GT73 | CMP-beta-KDO: alpHa-3-deoxy-D-manno-octulosonic-acid (KDO) transferase (EC 2.4.99.-).           |
|         |    | GT83 | undecaprenyl pHospHate-alpHa-L-Ara4N: 4-amino-4-deoxy-beta-L-arabinosyltransferase (EC 2.4.2.-) |
|         |    | GT9  | lipopolysaccharide N-acetylglucosaminyltransferase (EC 2.4.1.56)                                |
| plasmid | PL | PL22 | oligogalacturonate lyase / oligogalacturonide lyase (EC 4.2.2.6)                                |
|         |    | CE10 | arylesterase (EC 3.1.1.-)                                                                       |
|         | CE | CE1  | acetyl xylan esterase (EC 3.1.1.72)                                                             |
|         |    | CE4  | acetyl xylan esterase (EC 3.1.1.72)                                                             |
|         | GH | GH23 | lysozyme type G (EC 3.2.1.17)                                                                   |

**Supplementary Table S3.** Sensory rating scales for different fermentation times

| Sample | Aroma quality | Aroma quantity | Smoke | woody odor | aftertaste | bad odor | irritation | Total score |
|--------|---------------|----------------|-------|------------|------------|----------|------------|-------------|
| 0h     | 5.0           | 5.0            | 5.0   | 5.0        | 5.0        | 5.0      | 5.0        | 35.0        |
| 8h     | 5.0           | 5.5            | 5.0   | 5.0        | 5.0        | 5.0      | 5.0        | 35.5        |

|     |     |     |     |     |     |     |     |      |
|-----|-----|-----|-----|-----|-----|-----|-----|------|
| 16h | 5.0 | 5.5 | 5.0 | 5.0 | 5.1 | 5.0 | 5.5 | 36.1 |
| 24h | 5.5 | 5.5 | 5.4 | 5.3 | 5.3 | 4.5 | 5.0 | 37.0 |
| 36h | 5.3 | 5.2 | 4.7 | 4.6 | 5.0 | 4.8 | 4.5 | 34.1 |

---
